# Supplementary material for: Collagen type 1 promotes survival of human breast cancer cells by overexpressing Kv10.1 potassium and Orai1 calcium channels through DDR1-dependent pathway
Source: PubMed Central journal article supplement (PMC5973854; doi:10.18632/oncotarget.19065), 2017-07-08
Supplement: oncotarget-09-24653-s001.pdf [file oncotarget-09-24653-s001.pdf]

## Collagen type 1 promotes survival of human breast cancer cells by overexpressing Kv10.1 potassium and Orai1 calcium channels through DDR1-dependent pathway

### SUPPLEMENTARY MATERIALS

**A**

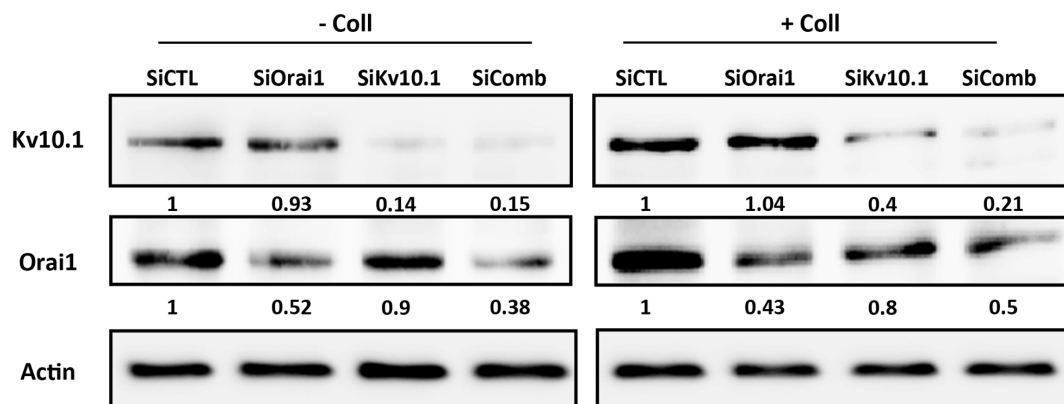

**B**

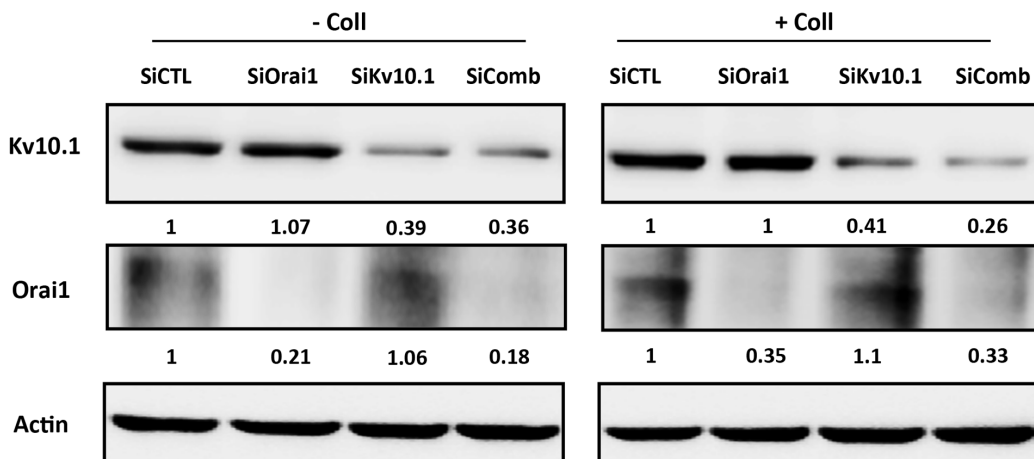

**Supplementary Figure 1:** Efficiency of the transfection (siKv10.1, siOrai1 and siComb (siKv10.1 + siOrai1)) in MCF-7 (A) and T-47 D (B) cells. The expression of Kv10.1 and Orai1, with (+ Coll) or without collagen 1 (- Coll), were analyzed 72 h post-transfection by western blotting. Results were normalized as a percentage of the control condition (siCTL).

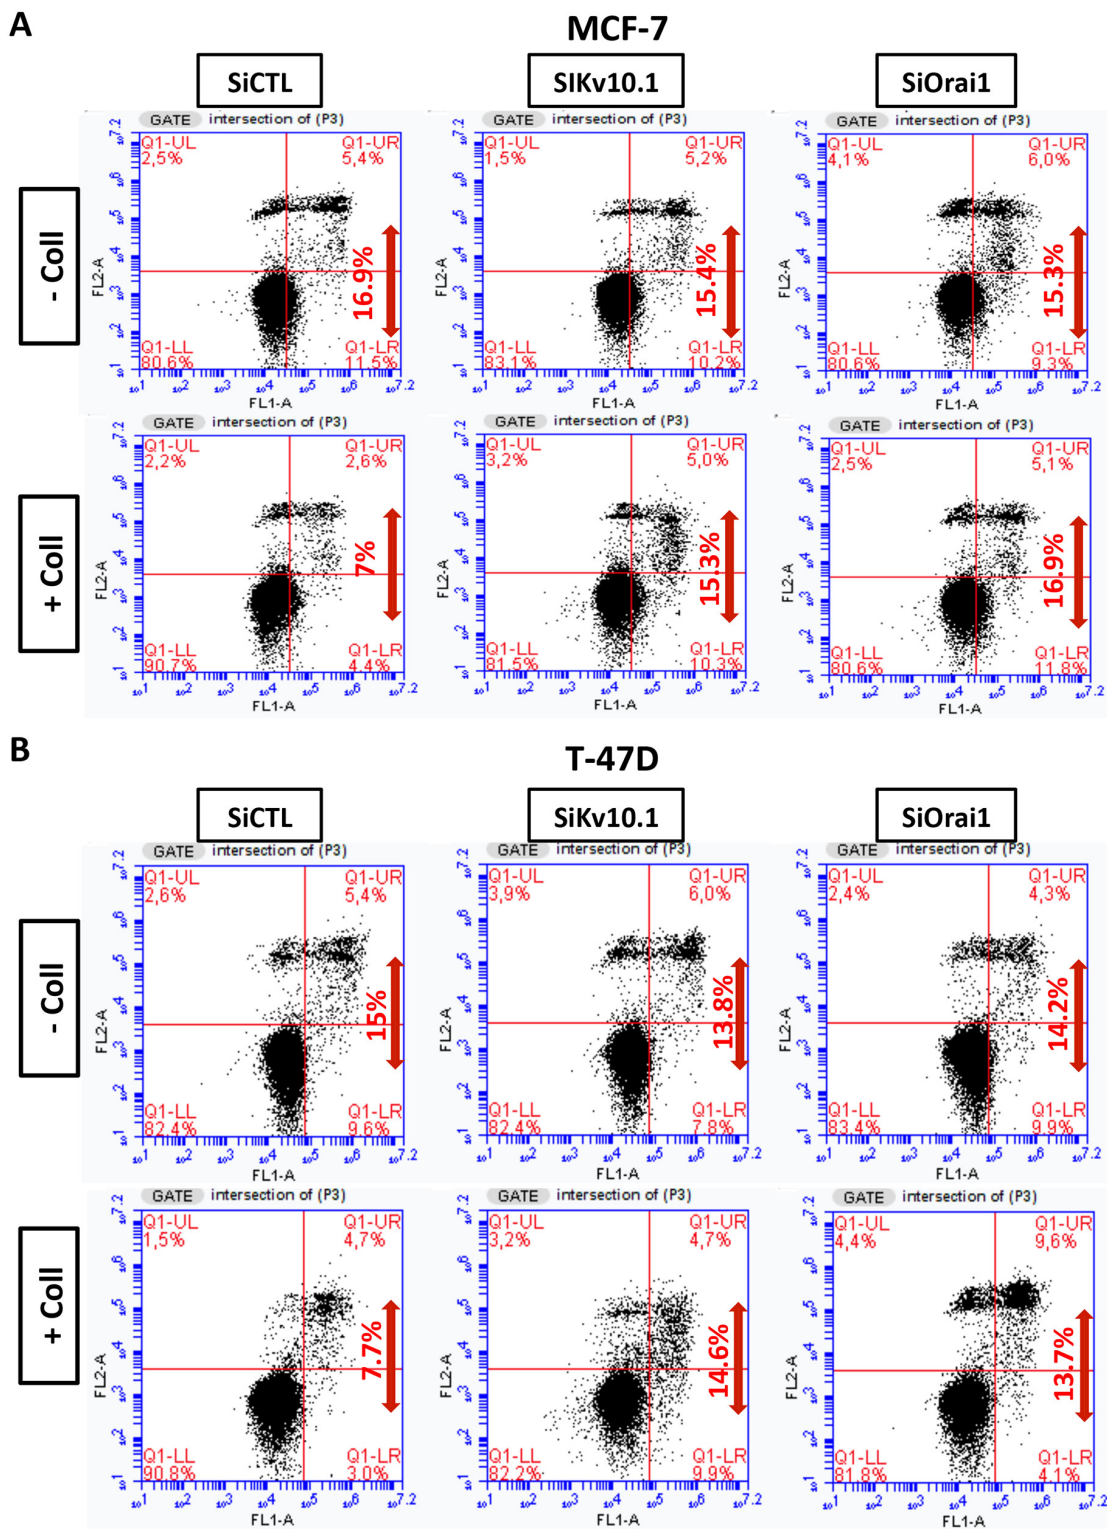

**Supplementary Figure 2:** Measurement of rate of apoptosis in plastic and collagen 1 conditions 48 h post-starvation by Annexin V staining in MCF-7 (A) and T-47D (B) cells transfected with siKv10.1 or siOrai1.

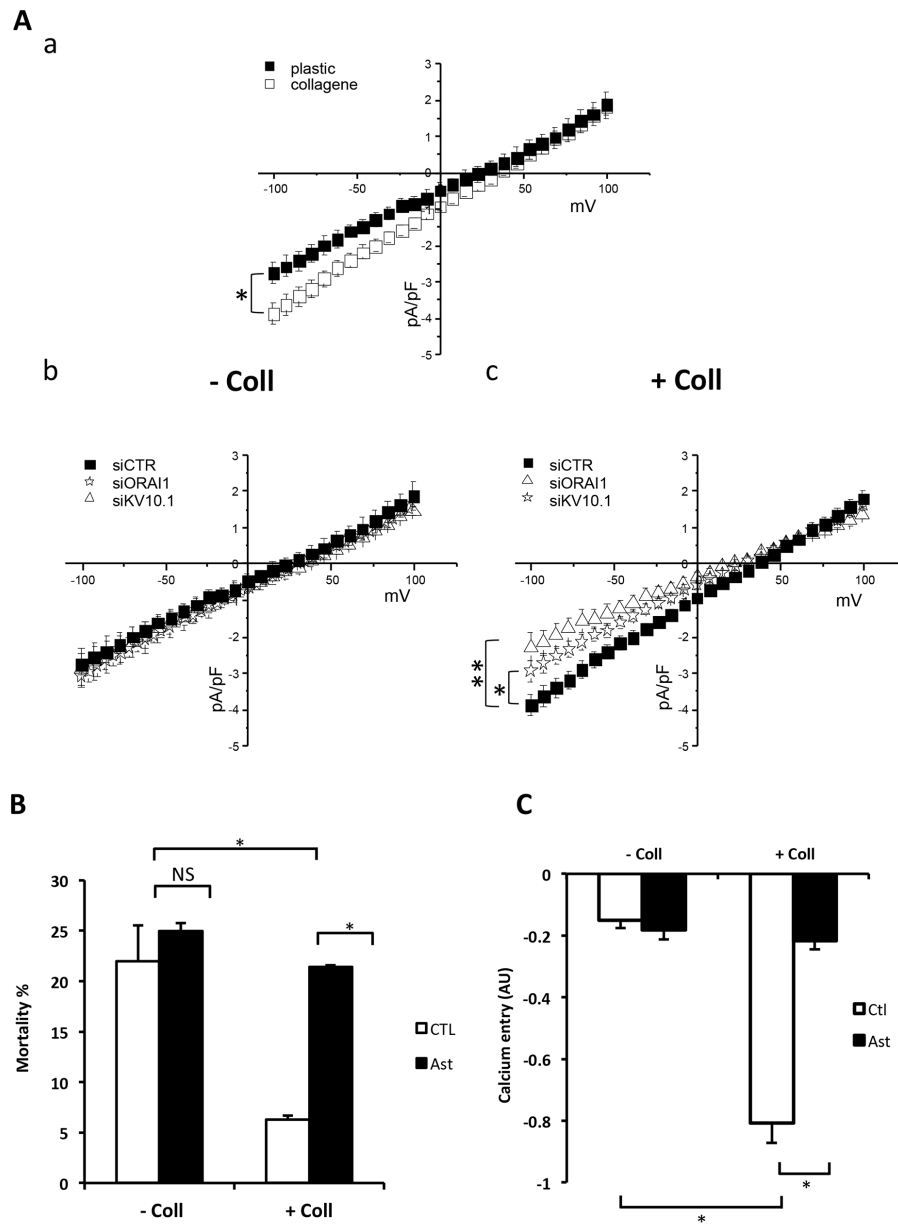

**Supplementary Figure 3: Involvement of Kv10.1 and Orai1 in calcium current induced by collagen 1.** (A) Collagen 1 increased  $\text{Ca}^{2+}$  inward current amplitude measured at  $-100\text{mV}$  (a). (b-c) The  $\text{Ca}^{2+}$  inward current amplitude decreased only in MCF-7 cells transfected with siKv10.1 or Orai1 and coated on collagen 1. (B) Effect of pharmacological inhibition of Kv10.1 using astemizole (Ast) on MCF-7 cell mortality. Cells were incubated with Ast ( $5\ \mu\text{M}$ ) for 24 h and the cell mortality was measured 48 h post-starvation. Values are reported as mean {plus minus} SEM of triplicate experiments,  $*p < 0.05$ , ANOVA. - Coll: without collagen1, + Coll: with collagen 1. (C) Effect of pharmacological inhibition of Kv10.1 (astemizole  $5\ \mu\text{M}$ , Ast, for 24 h) on collagen-dependant  $\text{Ca}^{2+}$  entry by using  $\text{Mn}^{2+}$  quenching experiments. Mean slope values are reported as mean  $\pm$  SEM of triplicate experiments,  $*p < 0.05$ , ANOVA. - Coll: without collagen1, + Coll: with collagen 1

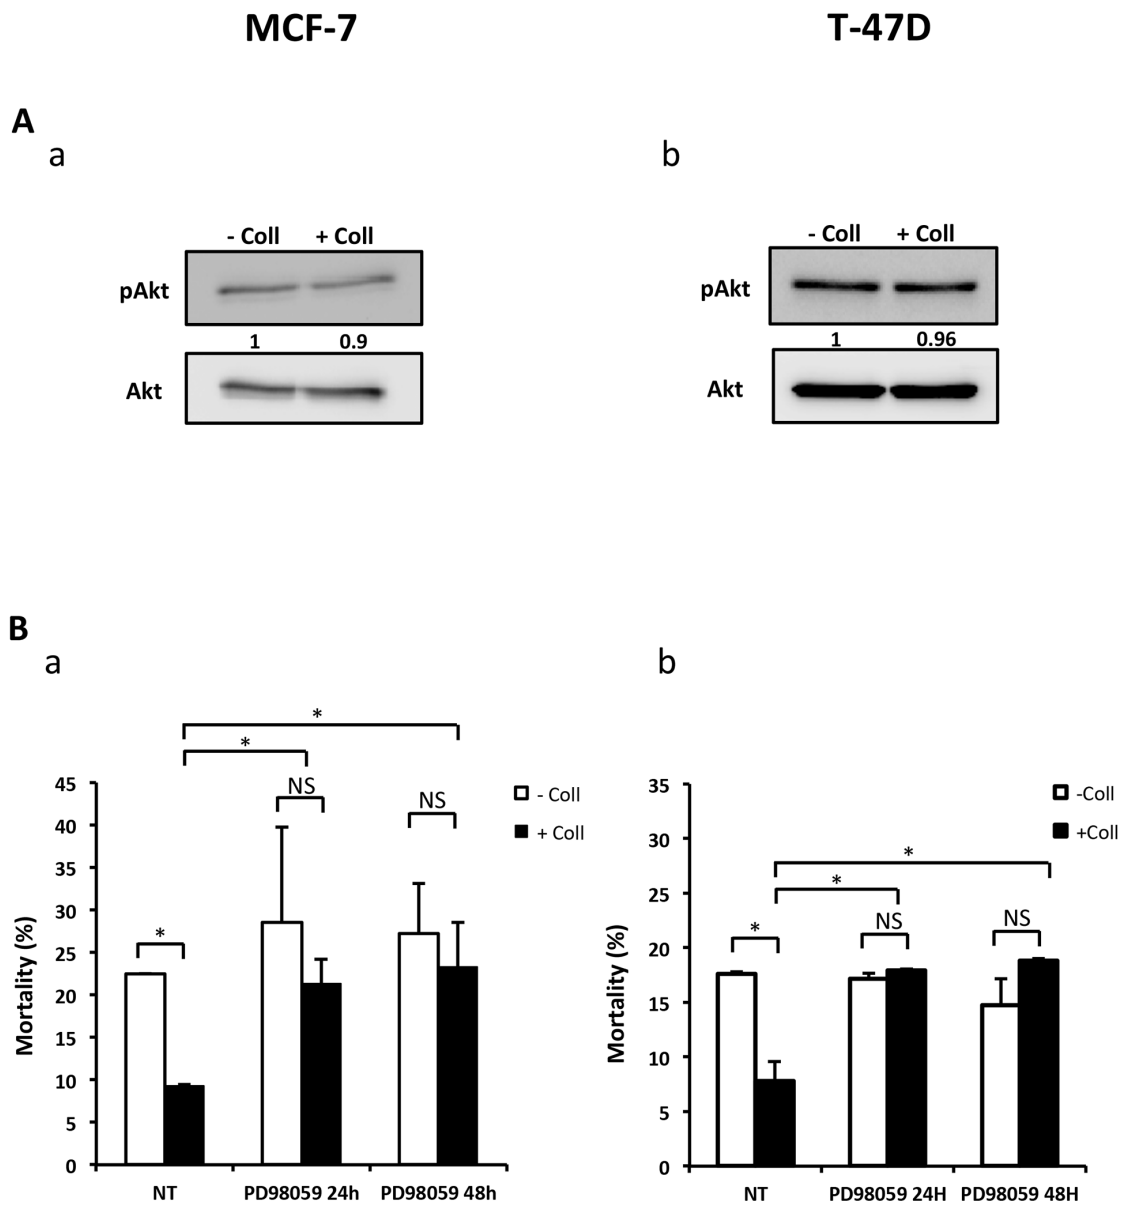

**Supplementary Figure 4:** (A) Collagen 1 was without effect on Akt phosphorylation in both MCF-7 (a) and T-47D cells (b). (B) Effect of a 24 h or 48 h treatment by PD98059 (40  $\mu$ M) on MCF-7 (a) and T-47 D (b) cells mortality. Values are reported as mean  $\pm$  SEM of triplicate experiments, \* $p$ <0.05, ANOVA.

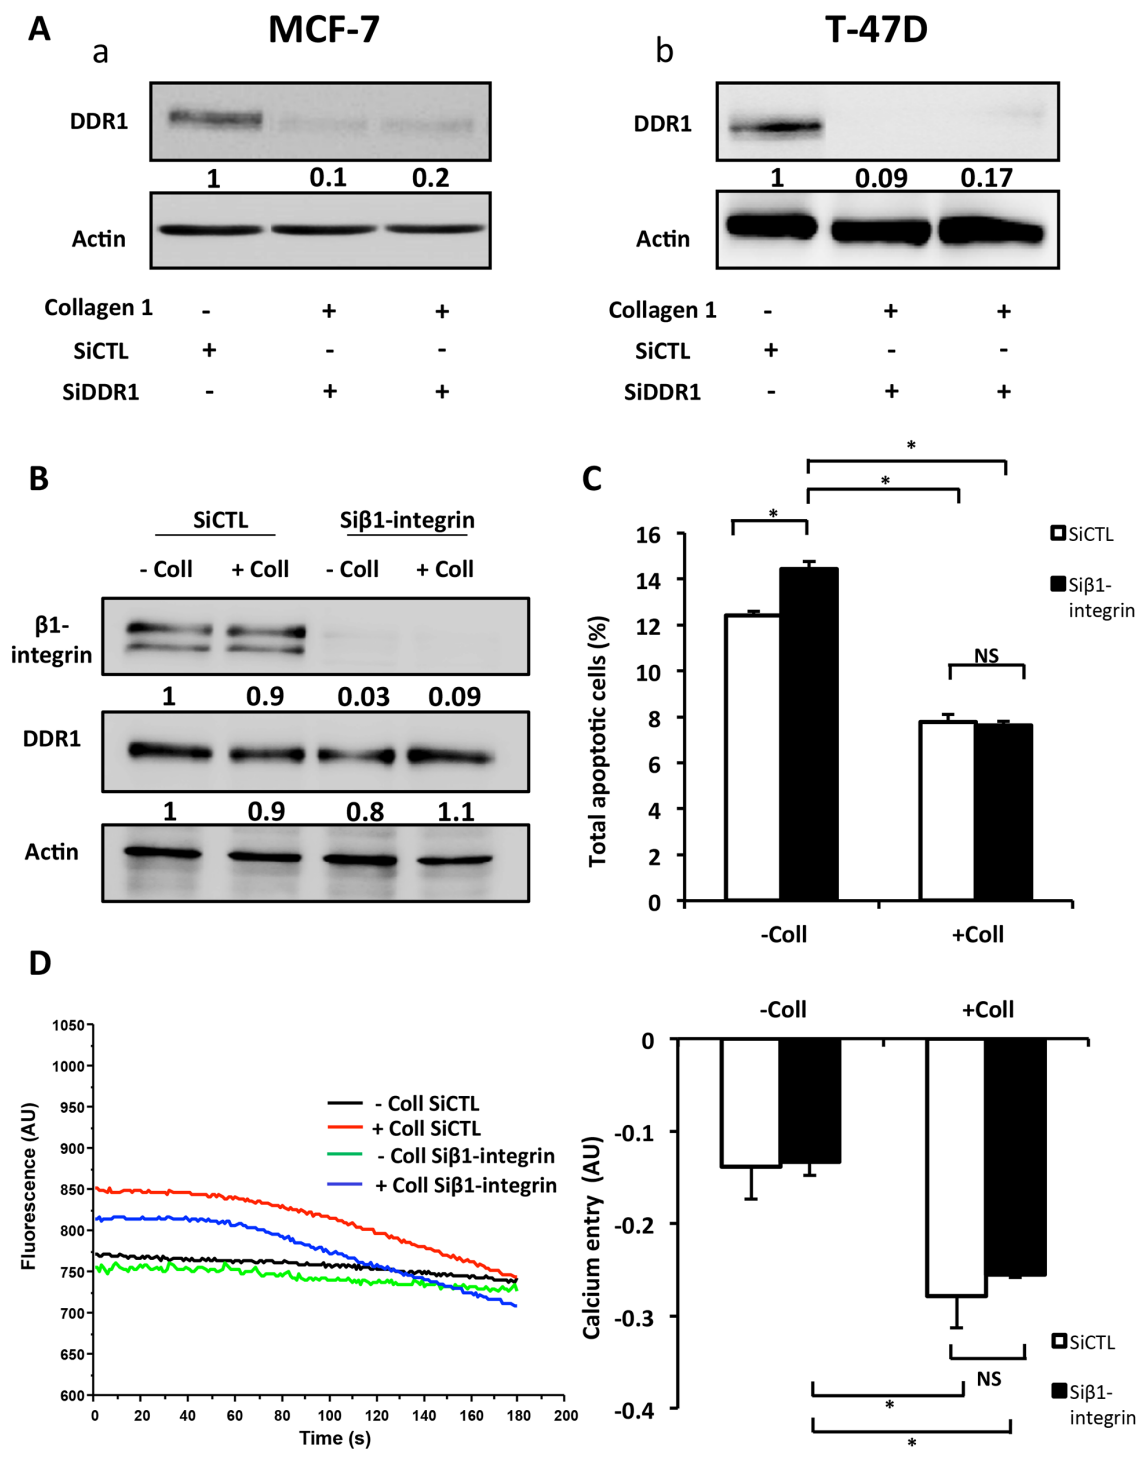

**Supplementary Figure 5:** (A) Representative Western Blot showing DDR1 expression in MCF-7 (a) and T-47D (b) cells 48 h post-starvation and the transfection efficiency of siDDR1 72 h post-transfection. (B-D) Transfection efficiency of β1-integrin, and the effect on DDR1 expression (B), apoptosis rate (C) and calcium entry (D) in MCF-7 cells seeded or not on collagen 1.

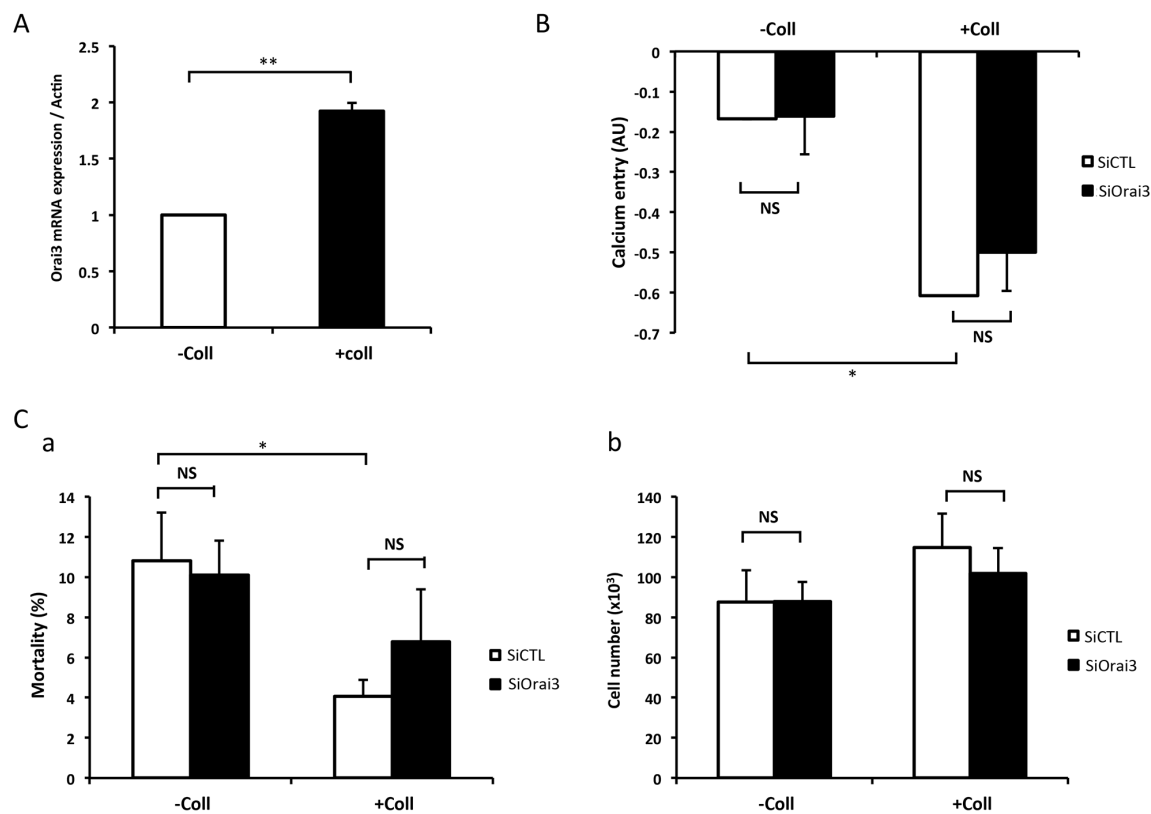

**Supplementary Figure 6:** (A) Effect of Collagen 1 on Orai3 expression. (B) Effect of Orai3 silencing on basal Ca<sup>2+</sup> influx by using Mn<sup>2+</sup> quenching experiments. Mean slope values are reported as mean  $\pm$  SEM of triplicate experiments, \* $p$ <0.05, ANOVA. (C) Effect of Orai3 silencing on cell mortality (a) and viability (b). Cells were starved for 48 h. The mortality and the viability were measured by Trypan Blue, values are reported as mean  $\pm$  SEM of triplicate experiments, \* $p$ <0.05, ANOVA.

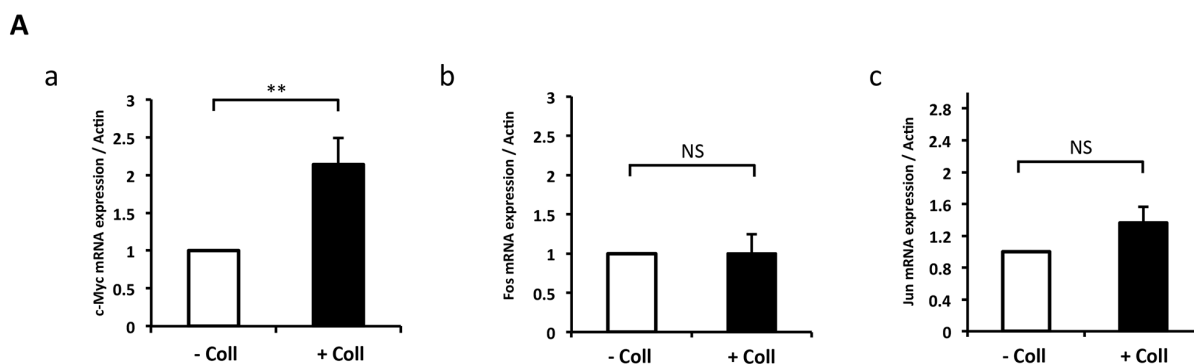

**Supplementary Figure 7:** (A) Expression of c-Myc (a), Fos (b) and Jun (c) mRNA by using qPCR in MCF-7 cells 48 h post-starvation in the presence (+ Coll) or not (- Coll) of collagen 1. Results were normalized as a percentage of the control condition (without collagen) and reported as mean  $\pm$  SEM of triplicate experiments, \*\* $p$ <0.01, Student's  $t$ -test.
